# Supplementary material for: Proximity labeling expansion microscopy (PL-ExM) evaluates interactome labeling techniques
Source: Royal Society of Chemistry journal article supplement (doi:10.1039/d4tb00516c), 2024-01-01
Supplement: d4tb00516c1.pdf [file d4tb00516c1.pdf]

1  
2  
3 **Supplementary Information**

4 **Proximity labeling expansion microscopy (PL-ExM) evaluates interactome labeling**  
5 **techniques**

6 **Authors:** Sohyeon Park<sup>1</sup>, Xiaorong Wang<sup>2</sup>, Yajin Mo<sup>1</sup>, Sicheng Zhang<sup>3</sup>, Xiangpeng Li<sup>4</sup>,  
7 Katie C. Fong<sup>3,5</sup>, Clinton Yu<sup>2</sup>, Arthur A. Tran<sup>6</sup>, Lorenzo Scipioni<sup>7,8</sup>, Zhipeng Dai<sup>4</sup>, Xiao  
8 Huang<sup>9</sup>, Lan Huang<sup>2</sup>, Xiaoyu Shi<sup>1,3,8,10,\*</sup>

9  
10 **Affiliations:**

11  
12 <sup>1</sup> Center for Complex Biological Systems, University of California, Irvine; Irvine, 92697,  
13 United States.

14 <sup>2</sup> Physiology and Biophysics, University of California, Irvine; Irvine, 92697, United States.

15 <sup>3</sup> Department of Developmental and Cell Biology, University of California, Irvine; Irvine,  
16 92697, United States.

17 <sup>4</sup> Department of Bioengineering and Therapeutic Sciences, University of California, San  
18 Francisco; San Francisco, 94143, United States.

19 <sup>5</sup> Current Address: School of Criminal Justice and Criminalistics, California State  
20 University, Los Angeles; Los Angeles, 90042, United States.

21 <sup>6</sup> Cardiovascular Research Institute, School of Medicine, University of California, San  
22 Francisco; San Francisco, 94143, United States.

23 <sup>7</sup> Laboratory for Fluorescence Dynamics, University of California, Irvine; Irvine, 92697,  
24 United States.

25 <sup>8</sup> Department of Biomedical Engineering, University of California, Irvine; Irvine, 92697,  
26 United States.

27 <sup>9</sup> School of Biomedical Engineering, Science and Health Systems, Drexel University;  
28 Philadelphia, PA19104.

29 <sup>10</sup> Department of Chemistry, University of California, Irvine; Irvine, 92697, United States.

30

31 \*Corresponding author: Xiaoyu Shi. Email: [xiaoyu.shi@uci.edu](mailto:xiaoyu.shi@uci.edu)

## 32 Image resolution measurement

33 0.1 $\mu$ m size fluorescent beads (TetraSpeck Microspheres, Invitrogen; T7279) were used  
34 to measure the resolution of the Airyscan LSM980 resolution with 63x water immersion  
35 objective (NA1.15). 30 different beads were sampled to obtain the average full width half  
36 maximum (FWHM) with standard error. The effective resolution of PL-ExM was measured  
37 by calculating FWHM divided by the physical length expansion factor of the hydrogel.

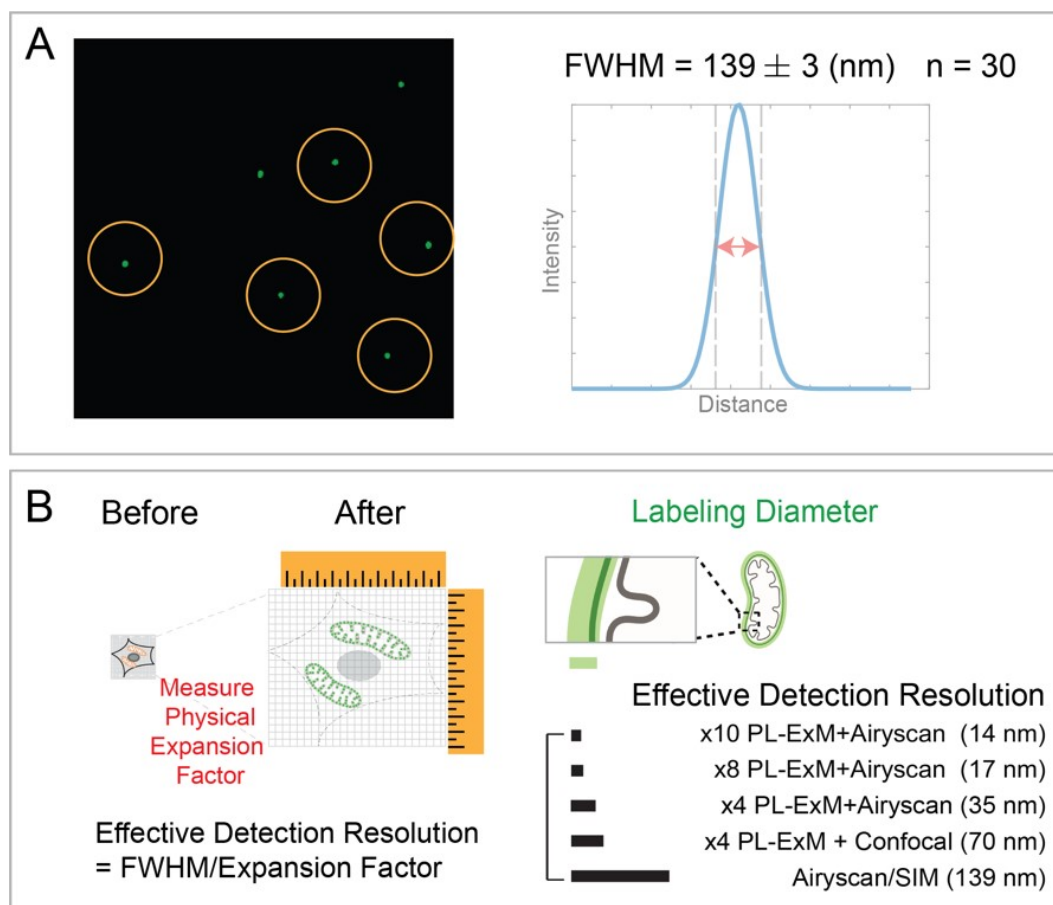

38

39 **Figure S1. Resolution measurement.** (A) A 0.1 $\mu$ m size fluorescent bead slide is used  
40 to measure the resolution of the Airyscan LSM980 with 63x water immersion objective  
41 (NA1.15), which is the system used for this paper. 30 different beads are sampled to  
42 obtain average full width half maximum (FWHM) value with standard error. Measured  
43 value is  $139 \pm 3$  nm (mean  $\pm$  standard error). (B) The effective resolution of PL-ExM after  
44 different times of expansion. The measured effective resolution of PL-ExM in this paper  
45 was in the range of 14 – 70 nm depending on the length expansion factors and the type  
46 of microscope.

47 **Chemical reactions in PL-ExM**

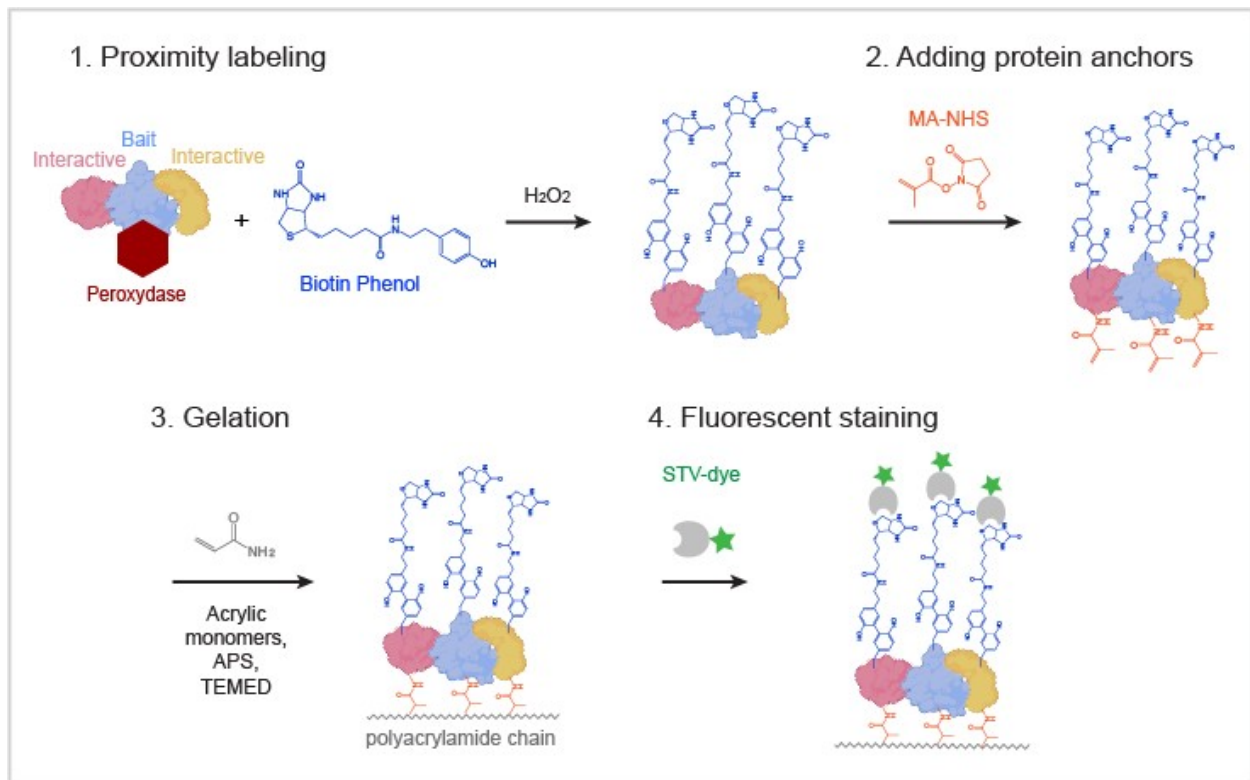

48

49

50 **Figure S2. Chemical reactions involved in the PL-ExM workflow, including**  
51 **proximity labeling, protein anchoring, gelation, and fluorescent staining steps.**

52 **PL-ExM imaging using confocal microscopy**

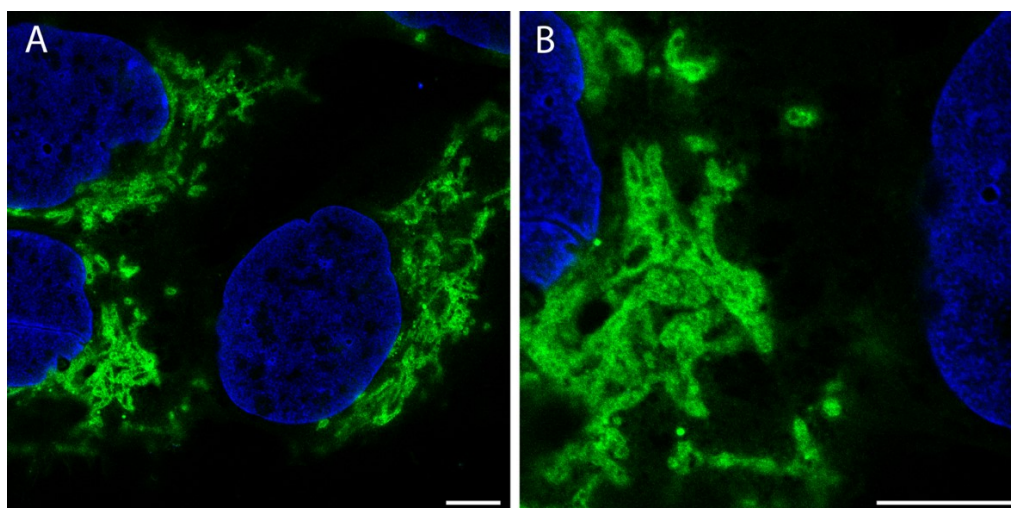

53

54 **Figure S3. Confocal PL-ExM images of mitochondria in U2OS cells.** Proteins in the  
55 proximity of TOMM20 were labeled with antibodies conjugated with HRP (green). DNA  
56 was stained with DAPI (blue). The images were taken on a laser scanning confocal  
57 microscopy LSM780 with 63x water immersion objective (NA1.15). Length expansion  
58 factor: 4.1. Scale bars: 5  $\mu\text{m}$  (physical size post-expansion, 20.5  $\mu\text{m}$ ).

59

60 **APEX and HRP approaches of PL-ExM**

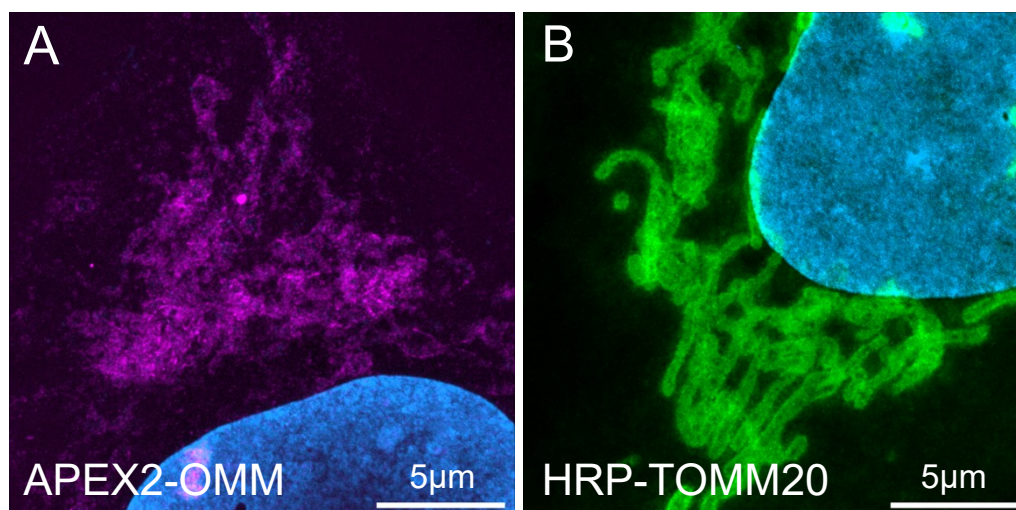

61

62 **Figure S4. Airyscan PL-ExM images of mitochondria labeled with APEX2 or HRP as**  
63 **the peroxidase.** (A) Proteins in the proximity of APEX2 expressed with the outer  
64 mitochondrial membrane were labeled (magenta). DNA was stained with DAPI (blue). (B)  
65 Proteins in the proximity of TOMM20 were labeled with antibodies conjugated with HRP  
66 (green). DNA was stained with DAPI (blue). The images were taken on an Airyscan LSM

67 980 with 63x water immersion objective (NA1.15). Length expansion factor: 4.0. Scale  
68 bars: 5  $\mu$ m (physical size post-expansion, 20  $\mu$ m).

69

### 70 **TurboID approach of PL-ExM**

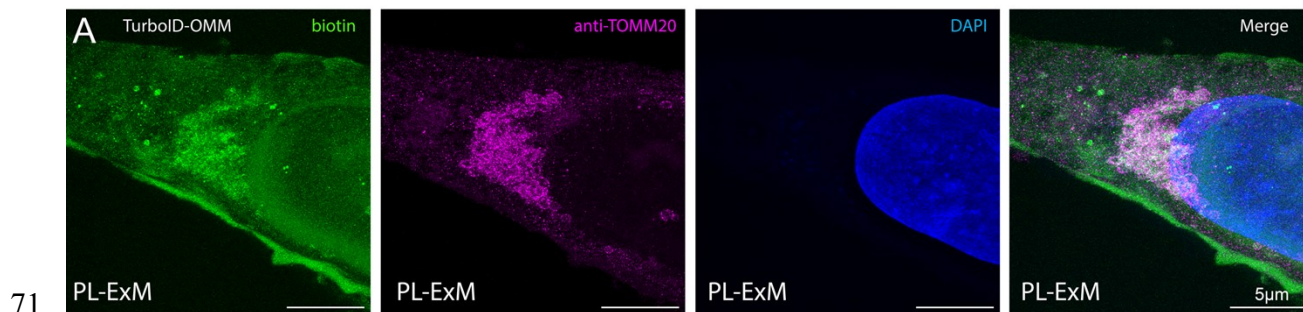

72 **Figure S5. Airyscan PL-ExM images of mitochondria labeled with TurboID**  
73 **approach.** Live cell PL was initiated for 30 min in cells stably expressing the TurboID-  
74 OMM fusion construct. (A) Biotinylated proteins were visualized by post-gelation staining  
75 with streptavidin- Alexa Fluor 488 and (B) Immunostaining of TOMM20 localized  
76 mitochondria. DAPI is a nuclear marker. Length expansion factor: 4.4. Scale bars, 5  $\mu$ m  
77 in pre-expansion unit. All images in this figure were taken on an Airyscan microscope.

78

## 79 Validation of APEX2-OMM cells shows negligible overexpression artifact

80 We are careful about the potential artifact that overexpressing APEX2-OMM could cause. As  
81 stated in the Methods, we made an APEX2-OMM plasmid with a moderate promoter SFFV rather  
82 than CMV to transfect U2OS cells. The strong CMV promoter can easily introduce  
83 overexpression. However, we didn't observe noticeable artifacts in our cell lines expressing  
84 APEX2-OMM with the SFFV promoter. In our SFFV APX2-OMM cell line, a FLAG- tag is fused  
85 on the N terminus of APEX2. We immunostained TOMM20 and FLAG-tag and performed APEX2-  
86 catalyzed PL. The colocalization of the signals from TOMM20, FLAG-tag, and APEX PL (Figures  
87 S6A-C) confirms that the APX2 was expressed specifically in mitochondria. The stringy and  
88 tubular morphology of mitochondria in our APEX2-OMM cells (Figure S6A) is similar to the typical  
89 mitochondrial morphology in U2OS cells (Figures 2A&G). This similarity indicates negligible  
90 overexpression artifact. More structural details are visualized in the multicolor PL-ExM images of  
91 APEX PL and immunostained TOM20 (Figures S6F-I).

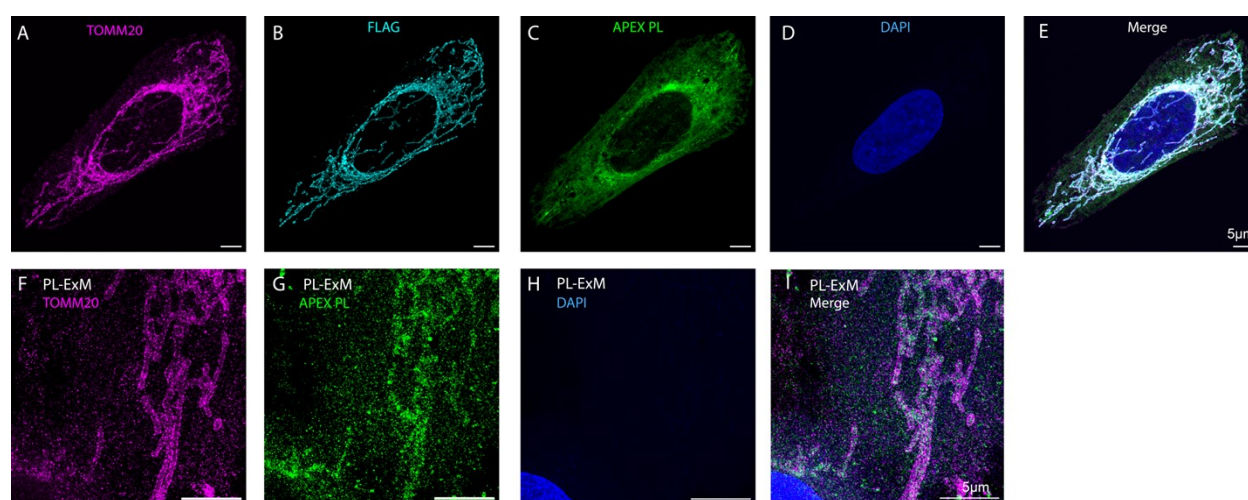

92  
93 **Figure S6. Validation of APEX2-OMM cells with Airyscan and PL-ExM.** (A-E)  
94 Fluorescence imaging of APEX2-mitochondria localization and biotinylation activity in a  
95 cell line stably expressing APEX2-OMM with SFFV promoter. A FLAG-tag is fused on the  
96 N terminus of APEX2 Live cell PL was performed for 1 min. Mitochondria (A) and FLAG-  
97 APEX2 (B) expression were visualized with antibody staining, while biotinylation was  
98 visualized with streptavidin-Alexa Fluor 488 (C). DAPI is a nuclear marker (D). Scale bars,  
99 5 μm.

100 (F-I) Multicolor PL-ExM images of APEX2-OMM cells. Live cell PL was performed for 1  
101 min in activity in the APEX2-OMM, followed by expansion microscopy. Mitochondria were  
102 marked with anti-TOMM20 antibodies (F), and biotinylated proteins were visualized with  
103 streptavidin- Alexa Fluor 488 (G). DAPI is a nuclear marker (H). Length expansion factor:  
104 4.4. Scale bars, 5 μm in pre-expansion unit.

105 All images in this figure were taken on an Airyscan microscope.

106 **3D PL-ExM imaging of brain tissues**

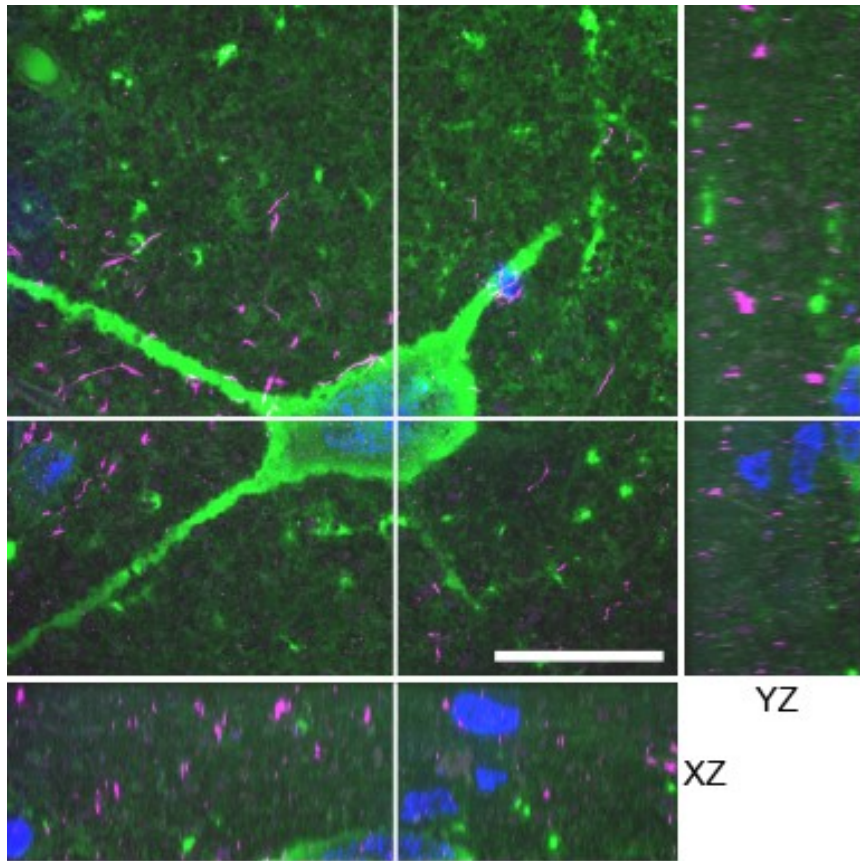

107

108 **Figure S7. Orthogonal views of PL-ExM imaging of mouse brain section.** The images,  
109 captured using Airyscan PL-ExM, depict a 20- $\mu$ m mouse brain section expressing Thy1-YFP.  
110 Proximity labeling was applied to Thy1-YFP (green) and GFAP was immunostained (magenta).  
111 Antibodies permeated tissue thoroughly for proximity labeling to occur robustly along the z-  
112 axis of the tissue. The tissue was expanded by a factor of 4.0. Scale bar: 20  $\mu$ m in pre-expansion  
113 units. All images in this figure were taken on an Airyscan microscope.

114 **Negative Controls for HRP-, APEX2-, and TurboID-catalyzed PL.**

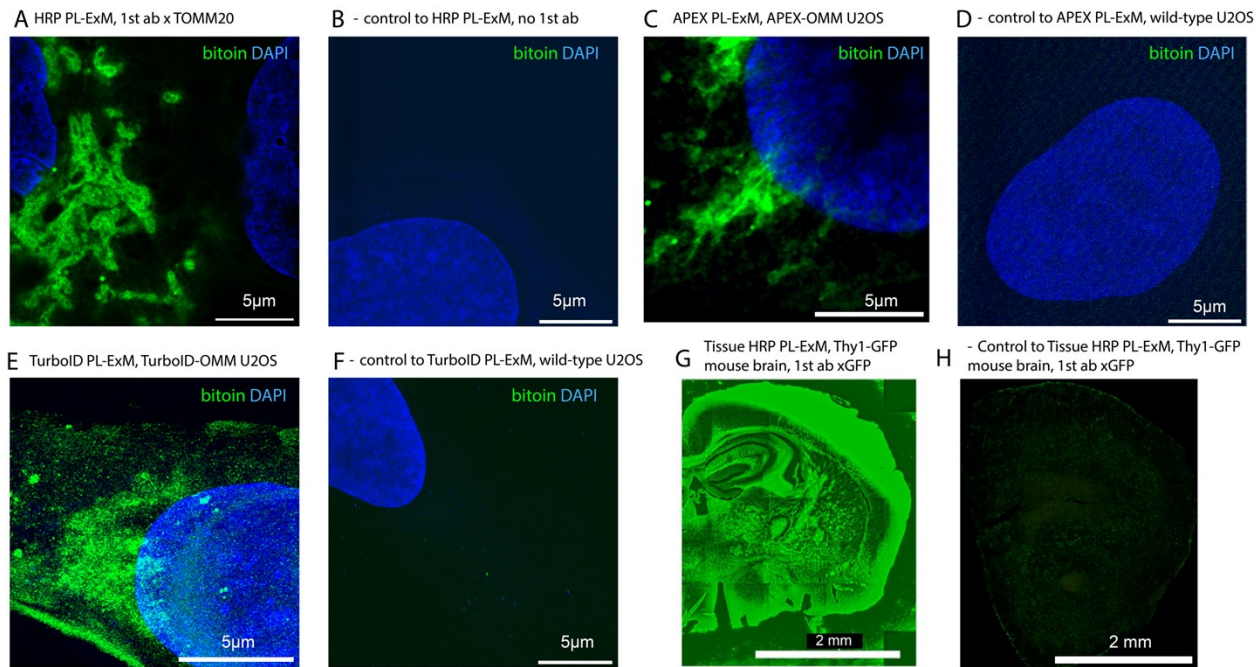

115

116 **Figure S8. Three approaches of PL-ExM with negative controls in cells, and tissues.**  
117 (A-B) HRP-catalyzed PL-ExM. PL was initiated for 30s. Biotinylation was visualized with  
118 streptavidin- Alexa Fluor 488 (A), while no primary antibody was used in the negative  
119 control (B). Length expansion factors: 4.0(A) and 4.4(B). Scale bars, 5 μm in pre-  
120 expansion unit.

121 (C-D) APEX2-catalyzed PL-ExM. Live cell PL was initiated for 1 min, and biotinylation  
122 was visualized with streptavidin- Alexa Fluor 488 (C), while wild-type U2OS cells without  
123 APEX2 were used in the negative control (D). Length expansion factors: 4.3(C) and  
124 4.4(D). Scale bars, 5 μm in pre-expansion unit.

125 (E-F) TurboID-catalyzed PL-ExM. Live cell PL was initiated for 30 min, and biotinylation  
126 was visualized with streptavidin- Alexa Fluor 488 (E), while wild-type U2OS cells without  
127 TurboID were used in the negative control (F). Length expansion factors: 4.4(E) and  
128 4.4(F). Scale bars, 5 μm in pre-expansion unit.

129 (G-H) HRP-catalyzed PL-ExM in a 20 μm tissue section of a mouse brain expressing  
130 Thy1-YFP. The samples were immunostained with Rabbit anti-GFP antibodies, followed  
131 by Donkey x Rabbit and HRP Horse x Goat antibodies. PL duration was 1 min.  
132 Biotinylation was visualized with streptavidin- Alexa Fluor 488 (G), while no primary  
133 antibody was used in the negative control (H). Length expansion factors: 4.0 (G) and  
134 4.1(H). Scale bars, 2 mm in pre-expansion unit.

135 All images in this figure were taken on an Airyscan microscope.
